# Supplementary material
Source: Springer Nature journal article supplement (https://www.springermedizin.de/resource/supplementary/13012_2012_560_MOESM10_ESM.pdf/9629998)
Supplement: MOESM10 [file 9629998]

|                                |                                                                                                                                                                                           |
|--------------------------------|-------------------------------------------------------------------------------------------------------------------------------------------------------------------------------------------|
| <b>Construct</b>               | <b>NPT sensitising questions for guidelines/training initiatives</b>                                                                                                                      |
| <b>Coherence</b>               | <b>How do stakeholders conceptualise (make sense of) the guideline/training initiative in terms of their role, content and applicability?</b>                                             |
| 1. Differentiation             | Can stakeholders differentiate the way of working proposed in the guideline/training initiative from their current way of working?                                                        |
| 2. Communal specification      | Can stakeholders build up a shared understanding of the aims, objectives and expected benefits of the guideline/training initiative?                                                      |
| 3. Individual specification    | Can individual stakeholders 'make sense' of the work that implementation of the guideline/training initiative would create for them in their routine work?                                |
| 4. Internalisation             | Can stakeholders grasp the potential value, benefits and importance of the guideline/training initiative?                                                                                 |
| <b>Cognitive participation</b> | <b>Do stakeholders engage with new the guideline/training initiative, and if yes, what roles do they take on (or not) to promote their implementation?</b>                                |
| 5. Initiation                  | Are stakeholders able and willing to drive the implementation of the guideline/training initiative forward and get others involved in the new practices?                                  |
| 6. Legitimation                | Do stakeholders believe it is right for them to be involved with the guideline/training initiative and that they can make a useful contribution to its implementation?                    |
| 7. Enrolment                   | Do stakeholders have the capacity and willingness to organise themselves in order to collectively contribute to the work involved in implementing the new guideline/training initiative?  |
| 8. Activation                  | Do stakeholders have the capacity and willingness to collectively define the actions and procedures needed to keep the new practice described in the guideline/training initiative going? |

|                              |                                                                                                                                                                                    |
|------------------------------|------------------------------------------------------------------------------------------------------------------------------------------------------------------------------------|
| <b>Collective action</b>     | <b>In practice, what factors promote or inhibit enacting a guideline/training initiative and how are implementation activities structured or constrained?</b>                      |
| 9. Interactional workability | Can stakeholders perform the tasks required by the guideline/training initiative?                                                                                                  |
| 10. Relational integration   | Can stakeholders maintain their trust in each other's work and expertise through their use of the guideline/training initiative?                                                   |
| 11. Skill set workability    | Is the work required for the implementation of the guideline/training initiative appropriately allocated to stakeholders with the right mix of skills and training to do the work? |
| 12. Contextual integration   | Is the implementation of the guideline/training initiative supported by management and other stakeholders? Is it supported at a policy level and by money and material resources?  |
| <b>Reflexive monitoring</b>  | <b>How do stakeholders appraise implementation practices and what are the effects of those practices?</b>                                                                          |
| 13. Systematisation          | Can stakeholders determine how effective and useful the guideline/training initiative is in their local setting, using formal or informal evaluation methods?                      |
| 14. Communal appraisal       | As a result of formal monitoring, do stakeholders collectively agree, or not, about the worth of the guideline/training initiative in their local setting?                         |
| 15. Individual appraisal     | Do stakeholders involved with, or affected by, the guideline/training initiative think it is worthwhile?                                                                           |
| 16. Reconfiguration          | Can stakeholders, individually or collectively, modify their work in response to the appraisal of the guideline/training initiative?                                               |
